# Supplementary material
Source: PubMed Central journal article supplement (PMC10147680)

**Supplemental table 1**

**Supplemental Table S1.** Supplemental Table 1 showing individual responses (CNI=calcineurin-inhibitors, CR=complete remission, CYC=cyclophosphamide, L=Levamisole, MMF=mycophenolate-mofetil, NR=nephrotic-range, PR=partial remission, ST=steroids)

| Patient | Sex | Age at diagnosis | Disease | Classification | Rituximab Cycle No. | Classification before Rituximab | Classification 3 Months after Rituximab | Classification 6 Months after Rituximab | Duration of Remission (months) | Serum-Creatinine | eGFR FAS (ml/min) | Previous therapies |
|---------|-----|------------------|---------|----------------|---------------------|---------------------------------|-----------------------------------------|-----------------------------------------|--------------------------------|------------------|-------------------|--------------------|
| A       | m   | 7                | MCD     | SDNS           | 1                   | CR                              | CR                                      | CR                                      | 26                             | 1.16             | 72                | ST,CNI             |
| A       |     |                  |         |                | 2                   | PR                              | CR                                      | CR                                      | 19                             | 0.82             | 115               | MMF                |
| B       | f   | 10               | MCD     | SDNS           | 1                   | PR                              | CR                                      | CR                                      | 38                             | 0.81             | 93                | ST, CNI,           |
| B       |     |                  |         |                | 2                   | PR                              | PR                                      | CR                                      | 89                             | 0.69             | 109               | MMF, CYC           |
| C       | f   | 58               | FSGS    | SRNS           | 1                   | NR                              | PR                                      | PR                                      | 7                              | 3.08             | 19                | ST, CNI,           |
| C       |     |                  |         |                | 2                   | PR                              | CR                                      | CR                                      | 103                            | 0.65             | 91                | TNF-Blockers       |
| D       | m   | 35               | MCD     | SDNS           | 1                   | NR                              | PR                                      | PR                                      | 13                             | 0.98             | 99                | ST, CNI            |
| D       |     |                  |         |                | 2                   | NR                              | PR                                      | PR                                      | 7                              | 0.87             | 111               | MMF                |
| E       | m   | 8                | MCD     | IRNS           | 1                   | NR                              | CR                                      | CR                                      | 73                             | 0.95             | 102               | ST, CNI,           |
| E       |     |                  |         |                | 2                   | PR                              | CR                                      | CR                                      | 5,5                            | 0.66             | 146               | CYC                |
| F       | f   | 60               | FSGS    | SRNS           | 1                   | NR                              | PR                                      | CR                                      | 10                             | 1.62             | 35                | ST, CNI, MMF       |
| F       |     |                  |         |                | 2                   | NR                              | CR                                      | CR                                      | 16                             | 1.43             | 40                |                    |
| G       | f   | 4                | MCD     | SRNS           | 1                   | NR                              | PR                                      | PR                                      | 8                              | 1.33             | 69                | ST,CNI,            |
| G       |     |                  |         |                | 2                   | NR                              | PR                                      | PR                                      | 63                             | 0.97             | 94                | MMF, CYC, L        |
| G       |     |                  |         |                | 3                   | NR                              | PR                                      | PR                                      | 62                             | 1.25             | 61                |                    |
| H       | m   | 46               | FSGS    | IRNS           | 1                   | NR                              | CR                                      | CR                                      | 30                             |                  |                   | ST, CNI,           |
| H       |     |                  |         |                | 2                   | NR                              | PR                                      | PR                                      | 7                              |                  |                   | MMF                |
| H       |     |                  |         |                | 3                   | NR                              | PR                                      | PR                                      | 103                            |                  |                   |                    |
| I       | m   | 31               | MCD     | FRNS           | 1                   | NR                              | PR                                      | PR                                      | 17                             |                  |                   | ST, CNI            |
| I       |     |                  |         |                | 2                   | NR                              | PR                                      | PR                                      | 51                             | 1.20             | 70                | MMF                |
| I       |     |                  |         |                | 3                   | NR                              | PR                                      | PR                                      | 6                              |                  |                   |                    |
| J       | f   | 2                | MCD     | SDNS           | 1                   | PR                              | CR                                      | CR                                      | 20                             | 0.61             | 150               | ST, CNI,           |
| J       |     |                  |         |                | 2                   | NR                              | CR                                      | CR                                      | 28                             | 0.67             | 112               | MMF                |
| J       |     |                  |         |                | 3                   | NR                              | CR                                      | CR                                      | 21                             | 0.63             | 119               |                    |
| J       |     |                  |         |                | 4                   | NR                              | CR                                      | CR                                      | 29                             | 0.76             | 99                |                    |
| K       | m   | 7                | MCD     | SDNS           | 1                   | PR                              | CR                                      | CR                                      | 8                              | 0.60             | 102               | ST,CNI             |
| K       |     |                  |         |                | 2                   | NR                              | NR                                      | NR                                      | 4                              | 0.56             | 113               | MMF                |
| K       |     |                  |         |                | 3                   | NR                              | NR                                      | CR                                      | 16                             | 0.53             | 119               |                    |
| K       |     |                  |         |                | 4                   | NR                              | CR                                      | CR                                      | 21                             | 0.99             | 98                |                    |
| L       | m   | 59               | MCD     | SDNS           | 1                   | NR                              | CR                                      | CR                                      | 8                              |                  |                   | ST, CNI            |
| L       |     |                  |         |                | 2                   | NR                              | CR                                      | CR                                      | 13                             | 1.49             | 42                |                    |
| L       |     |                  |         |                | 3                   | NR                              | CR                                      | CR                                      | 12                             |                  |                   |                    |
| L       |     |                  |         |                | 4                   | NR                              | CR                                      | CR                                      | 11                             | 1.70             | 41                |                    |
| L       |     |                  |         |                | 5                   | NR                              | NaN                                     | CR                                      | 11                             | 1.58             | 44                |                    |
| L       |     |                  |         |                | 6                   | NR                              | CR                                      | CR                                      | 13                             | 2.74             | 25                |                    |
| M       | m   | 11               | MCD     | FRNS           | 1                   | NR                              | PR                                      | CR                                      | 5                              | 0.59             | 107               | ST, CNI,           |
| M       |     |                  |         |                | 2                   | NR                              | CR                                      | CR                                      | 15                             | 0.5              | 131               | MMF                |
| M       |     |                  |         |                | 3                   | NR                              | CR                                      | CR                                      | 47                             | 0.57             | 136               |                    |
| M       |     |                  |         |                | 4                   | NR                              | CR                                      | CR                                      | 22                             | 0.75             | 126               |                    |
| M       |     |                  |         |                | 5                   | NR                              | CR                                      | CR                                      | 21                             | 0.85             | 114               |                    |
| M       |     |                  |         |                | 6                   | NR                              | CR                                      | CR                                      | 32                             | 0.92             | 105               |                    |
| M       |     |                  |         |                | 7                   | NR                              | CR                                      | CR                                      | 16                             | 0.91             | 106               |                    |
| M       |     |                  |         |                | 8                   | NR                              | CR                                      | CR                                      | 7                              | 1.04             | 96                |                    |

# Supplemental figure 1

## Supplemental Figure S1. Level of proteinuria overall and for individual cycle

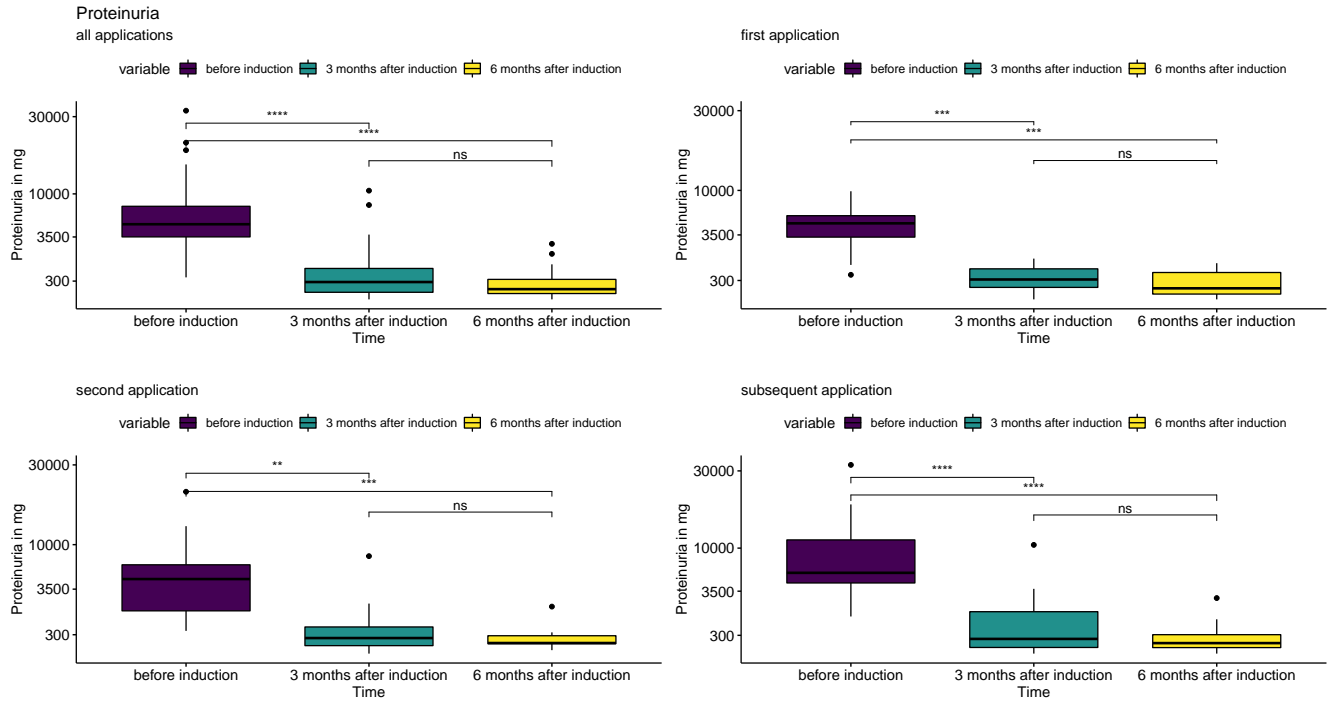

Supplemental figure 2

Supplemental Figure S2. Relapse-free survival by histology

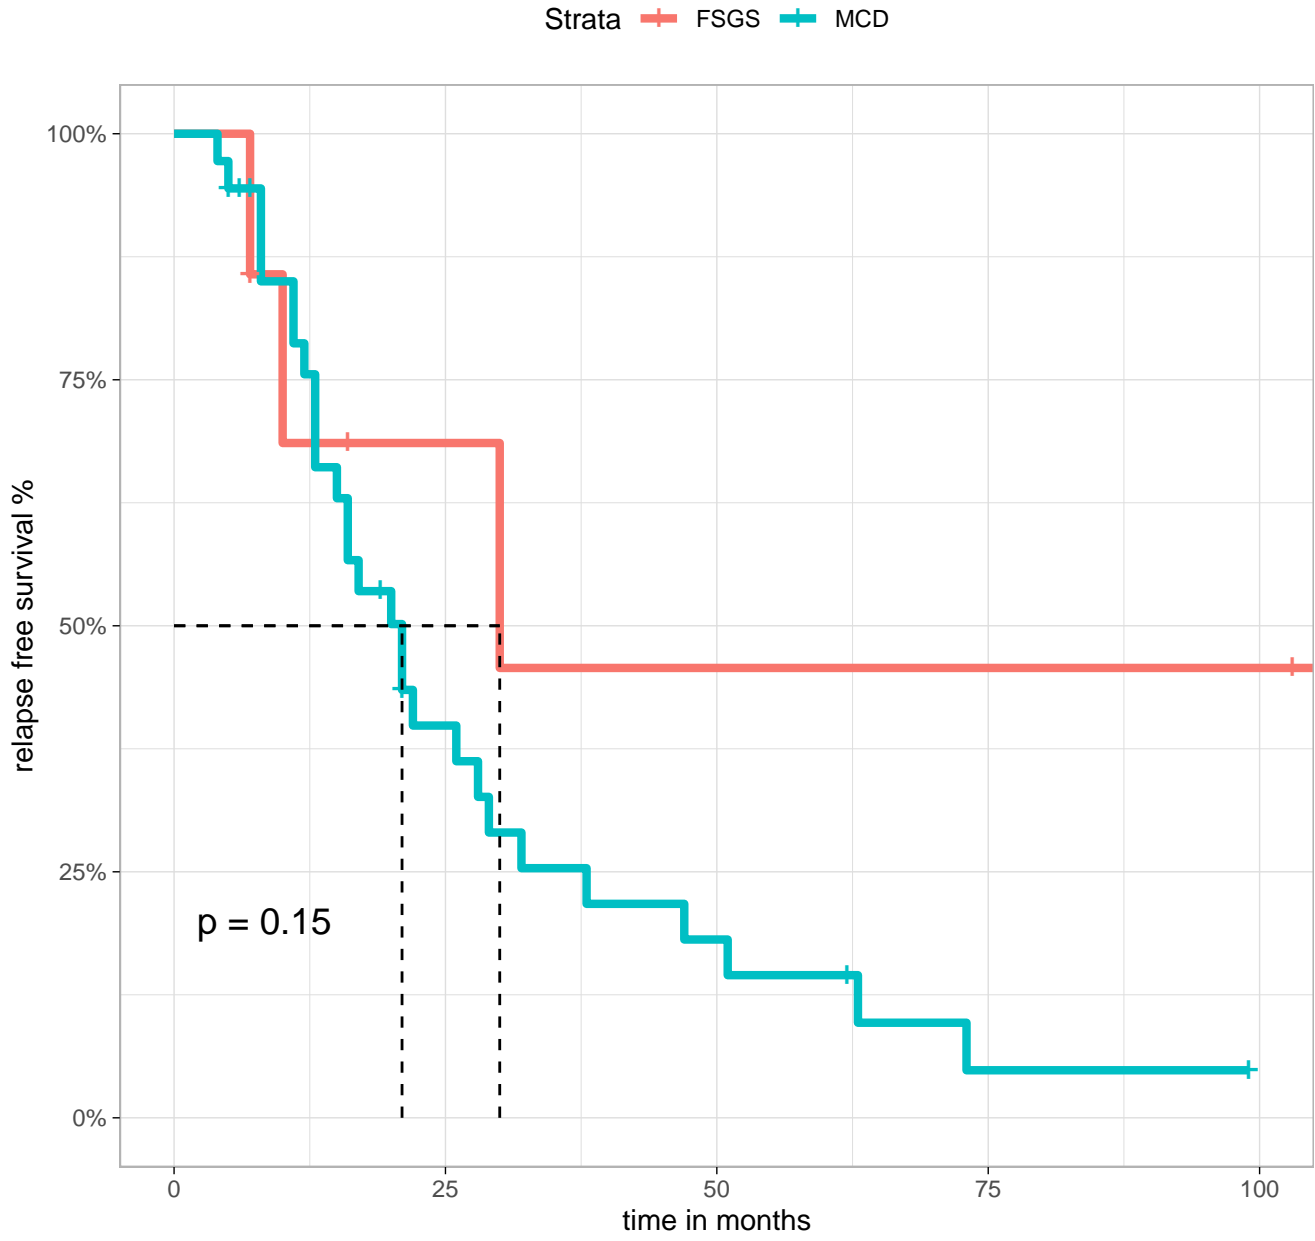

Supplemental figure 3

Supplemental Figure S3. Relapse-free survival after rituximab based on MMF-maintenance therapy

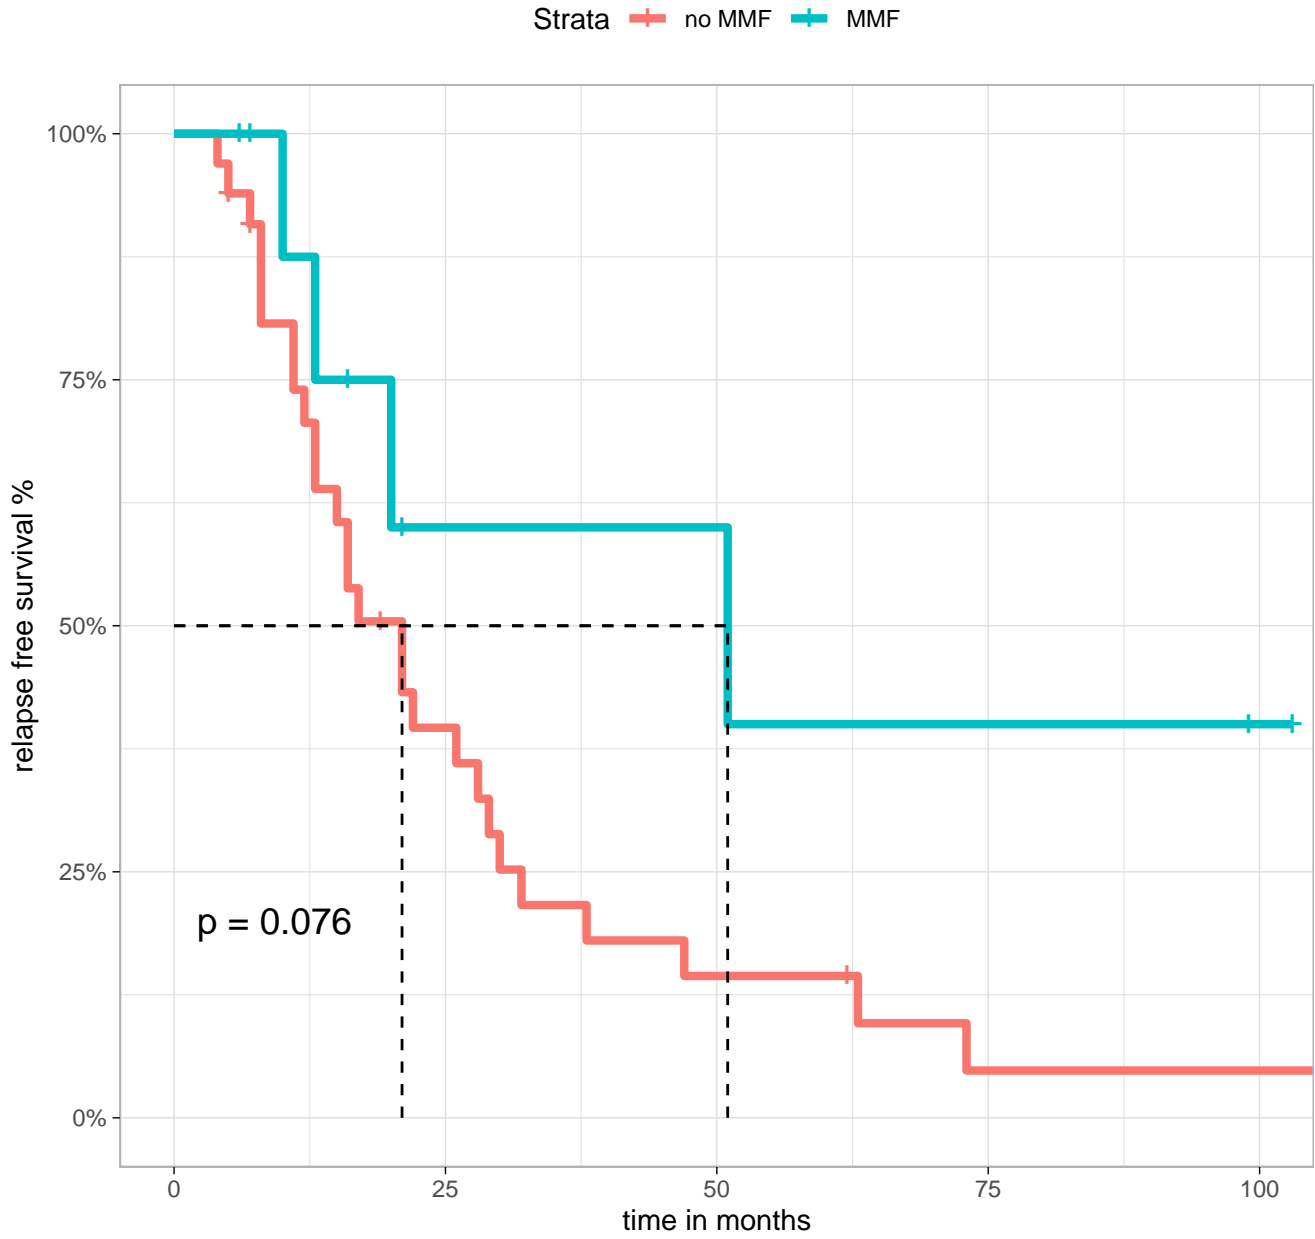

Supplemental figure 4

**Supplemental Figure S4.** Relapse-free survival after rituximab based on CNI-maintenance therapy

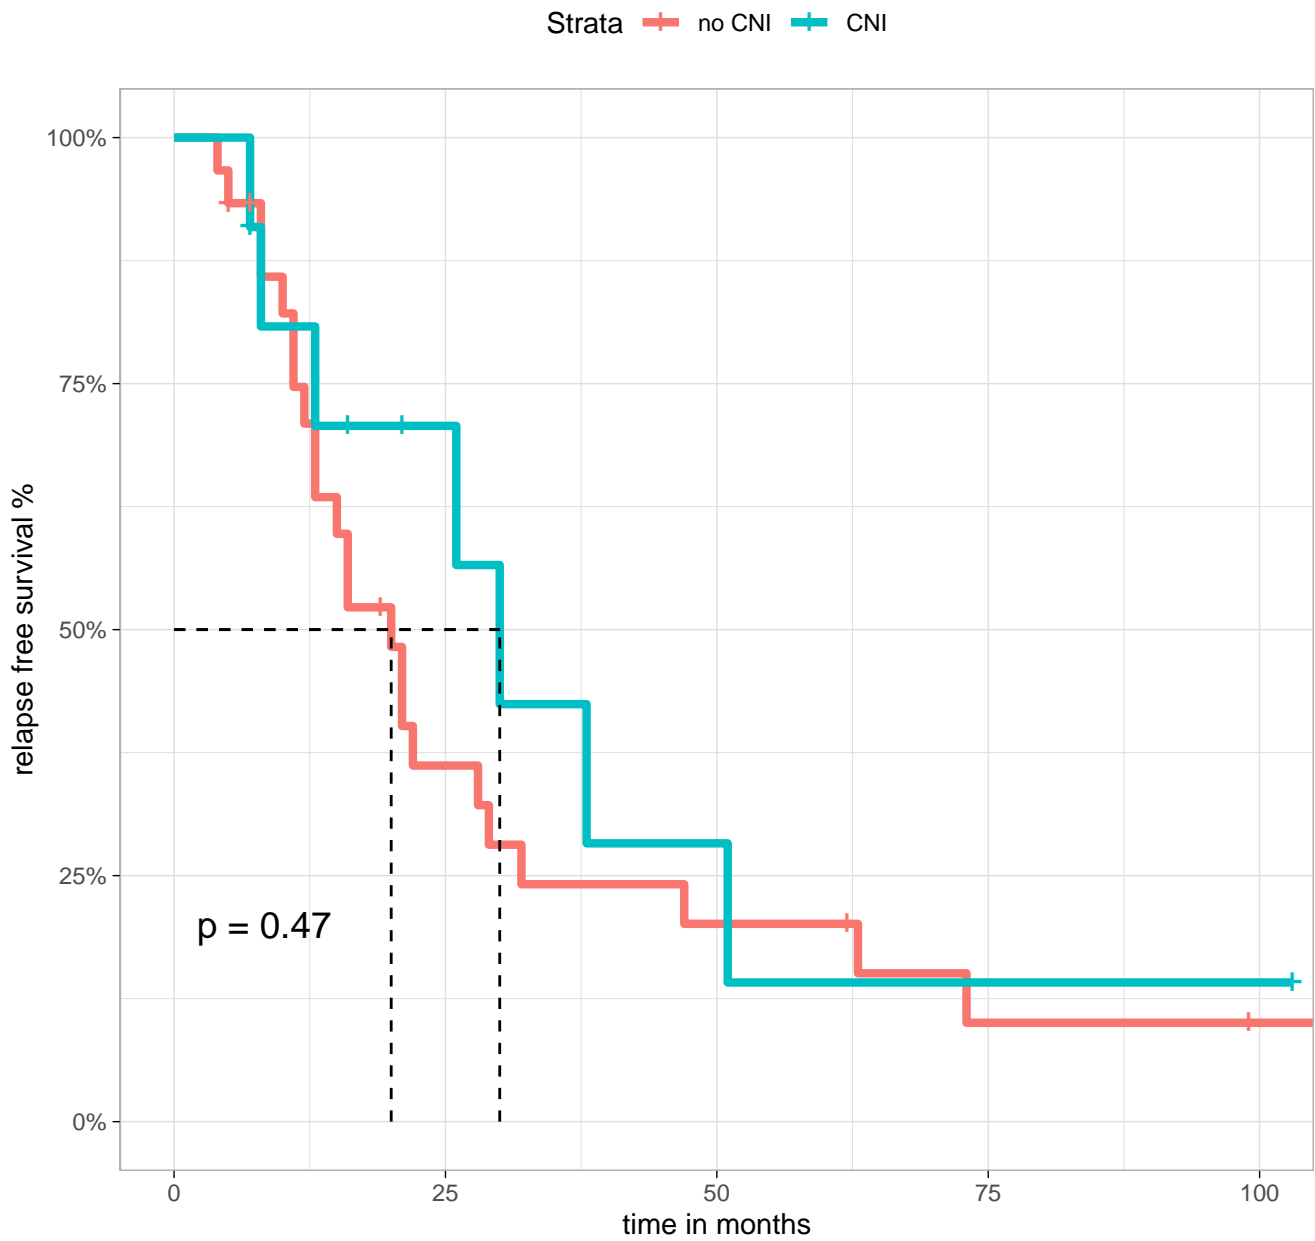

Supplement: 41598_2023_32576_MOESM1_ESM.pdf [file 41598_2023_32576_MOESM1_ESM.pdf]
